# Supplementary material
Source: publisher figshare collection journal article supplement (https://karger.figshare.com/ndownloader/files/13192595)
Supplement: Supplementary file 1 [file 13192595]

Supplementary Table. Regulatory approval dates of IBD drugs in each region (year/month)

|  | USA | | EU | | JPN | | KOR | | TWN | | PHL | |
| --- | --- | --- | --- | --- | --- | --- | --- | --- | --- | --- | --- | --- |
| CD | UC | CD | UC | CD | UC | CD | UC | CD | UC | CD | UC |
| 5-aminosalicylic acid drug |  |  |  |  |  |  |  |  |  |  |  |  |
| Salazosulfapyridine | 1950/6 | 1950/6 | 1945/9 | 1945/9 | 2002/3 | 2002/3 | NA | NA | NA | NA | NA | NA |
| Pentasa® | 1993/5 | 1993/5 | 1986/9 | 1986/9 | 1996/4 | 1996/4 | 1997/9 | 1997/9 | NA | 1998/11 | 2001/3 | 2001/3 |
| Asacol® | - | 1992/1 | - | 1984/11 | - | 2009/10 | - | 2004/3 | - | 1995/11 | - | NA |
| Lialda® | - | 2007/1 | - | 2006/12 | - | 2016/9 | - | 2010/3 | - | NA | - | NA |
| Steroid |  |  |  |  |  |  |  |  |  |  |  |  |
| Budesonide | 2001/10 | 2013/1 | 1995/3 | 2013/1 | 2016/9 | NA | NA | NA | NA | NA | NA | NA |
| Immunomodulator |  |  |  |  |  |  |  |  |  |  |  |  |
| Tacrolimus | - | NA | - | NA | - | 2009/7 | - | NA | - | NA | - | NA |
| Azathioprine | NA | NA | 1997/12 | 1997/12 | 2006/6 | 2006/6 | 2003/8 | 2003/8 | NA | NA | NA | NA |
| 6-mercaptopurine | NA | NA | NA | NA | NA | NA | 2007/9 | 2007/9 | NA | NA | NA | NA |
| Biologic agent |  |  |  |  |  |  |  |  |  |  |  |  |
| Infliximab | 1998/8 | 2005/9 | 1999/8 | 2006/2 | 2002/1 | 2010/6 | 1999/10 | 2007/5 | 2015/9 | 2015/9 | 2000/1 | 2005/10 |
| Infliximab-BS (CT-P13) | 2016/4 | 2016/4 | 2013/9 | 2013/9 | 2014/7 | 2014/7 | 2012/7 | 2012/7 | 2016/12 | 2016/12 | 2013/5 | 2013/5 |
| Adalimumab | 2007/2 | 2012/9 | 2007/6 | 2012/4 | 2010/10 | 2013/6 | 2007/11 | 2012/8 | 2007/12 | 2013/2 | 2016/2 | NA |
| Certolizumab | 2008/4 | - | 2007/9 | - | NA | - | NA | - | NA | - | NA | - |
| Golimumab | - | 2013/5 | - | 2013/9 | - | 2017/3 | - | 2014/5 | - | 2015/10 | - | NA |
| Vedolizumab | 2014/5 | 2014/5 | 2014/5 | 2014/5 | NA | NA | 2015/6 | 2015/6 | 2016/11 | 2016/11 | 2017/2 | NA |
| Natalizumab | 2008/1 | - | NA | - | NA | - | NA | - | NA | - | NA | - |
| Ustekinumab | 2016/9 | - | 2016/11 | - | 2017/3 | - | NA | - | NA | - | NA | - |

CD, Crohn’s disease; UC, ulcerative colitis; NA, not approved; USA, United States of America; EU, European Union; JPN, Japan;

KOR, Republic of Korea; TWN, Taiwan; PHL, Republic of the Philippines.
